# Supplementary material for: Attention–Survival Score: A Metric to Choose Better Keywords and Improve Visibility of Information
Source: MDPI journal article supplement (doi:10.3390/a16040196), 2023-04-03
Supplement: s1 [file s1]

# A tool for recommending keywords with more live and more attention

## Supplementary Material

### WordNet and CSO comparison

Down below, the Table S1 summarizes a list of common words included in WordNet and CSO ontology. The algorithm is limited to explore at only a distance of two neighbours from the original word.

| Original word                  | WordNet refinement          | Computer Science Ontology (CSO) refinement      |
|--------------------------------|-----------------------------|-------------------------------------------------|
| argumentation                  | discussion                  | computer_programming_languages                  |
| accelerometer                  | measuring instrument        | sensors                                         |
| administrative_data_processing | data processing             | database                                        |
| anonymity                      | anonymity                   | privacy                                         |
| artificial_intelligence        | robotics                    | artificial_intelligence                         |
| authentication                 | validation                  | security_of_data                                |
| binoculars                     | binoculars                  | binocular                                       |
| biometrics                     | eugenics                    | access_control                                  |
| blog                           | diary                       | internet                                        |
| broadcasting                   | radio                       | communication_channels_%28information_theory%29 |
| buffer_storage                 | fund                        | bandwidth                                       |
| cad                            | scoundrel                   | computer_aided                                  |
| channel_capacity               | channel_capacity            | communication_channels_%28information_theory%29 |
| chaotic_attractor              | attractor                   | cryptography                                    |
| classification_system          | edition                     | control_system                                  |
| clustering                     | meet                        | clustering                                      |
| computer_programming           | computer_programming        | computer_programming                            |
| computer_science               | plan                        | software                                        |
| computer_virus                 | computer_virus              | security_of_data                                |
| computer-aided_design          | software                    | computer_aided                                  |
| computerized_tomography        | tomography                  | medical_imaging                                 |
| contract                       | flex                        | contract                                        |
| control_system                 | servo                       | control_system                                  |
| cosmic_microwave_background    | cosmic_microwave_background | polarimeter                                     |
| cryptography                   | cryptography                | cryptography                                    |
| cryptology                     | psychology                  | cryptography                                    |

|                               |                     |                                  |
|-------------------------------|---------------------|----------------------------------|
| data_mining                   | data_processing     | clustering                       |
| demodulation                  |                     | communication_channels_          |
|                               | reception           | information_theory               |
| e-commerce                    | e-commerce          | internet                         |
| edutainment                   | entertainment       | e-learning                       |
| electrical_energy             | AC                  | electrical_energy                |
| electromagnetism              | acoustics           | electromagnetic                  |
| electronic_mail               | spam                | internet                         |
| elementary_education          | pedagogy            | e-learning                       |
| ergonomics                    | technology          | human_computer_interaction       |
| facial_expression             | frown               | facial_expression                |
| file_system                   | file_system         | computer_science                 |
| flash_memory                  | flash_memory        | embedded_system                  |
| gateway                       | gateway             | routing_protocols                |
| handover                      | release             | mobile_telecommunication_systems |
| holmium                       | lu                  | rare_earth                       |
| industrial_management         | technology          | information_technology           |
| knowledge_base                | realm               | artificial_intelligence          |
| lexical_database              | lexical_database    | artificial_intelligence          |
| logic_gate                    | logic_gate          | hardware                         |
| logic_programming             | programming         | computer_programming_languages   |
| machine_translation           | robotics            | artificial_intelligence          |
| magnetic_storage              | magnetic_storage    | microprocessor_chips             |
| memory_access                 | memory_access       | memory_access                    |
| mobile_phone                  | cell                | sensors                          |
| network_architecture          | spec                | computer_network                 |
| neural_network                | rf                  | neural_network                   |
| nuclear_physics               | crystallography     | nuclear_physics                  |
| object-oriented_programming   | hack                | java                             |
| optical_fiber                 | loofa               | sensors                          |
| outage                        | breakdown           | outage                           |
| owl                           | raptor              | semantic_web                     |
| phase_modulation              | fm                  | sensors                          |
| privacy                       | privacy             | privacy                          |
| programming_language          | prolog              | programming_language             |
| purchasing                    | purchasing          | internet                         |
| reconstruction                | makeover            | reconstruction                   |
| relational_database           | relational_database | database                         |
| remote_control                | device              | robotics                         |
| robotics                      | robotics            | robots                           |
| search_engine                 | program             | internet                         |
| sip                           | ingestion           | internet_protocol                |
| source_code                   | source_code         | software_engineering             |
| speckle                       | speckle             | radar                            |
| spin                          | revolution          | spin                             |
| spline                        | remove              | computer-aided_design            |
| surveillance_system           | surveillance_system | cryptography                     |
| tactics                       | tactics             | software_design                  |
| target_language               | language            | machine_translation              |
| telecommunication_equipment   | television          | sensors                          |
| teleconferencing              | discussion          | telecommunication_services       |
| transmission_control_protocol | http                | internet_protocol                |
| user_interface                | CLI                 | sensors                          |

|                      |            |              |
|----------------------|------------|--------------|
| validation           | validation | validation   |
| verification         | checksum   | verification |
| virtual_storage      | memory     | database     |
| visual_communication | graphics   | image_coding |
| web_page             | web_page   | internet     |
| white_noise          | impediment | white_noise  |
| wireless             | wireless   | cellular     |

Table S1: WordNet vs CSO refinement. The list of original words is included in both ontologies (WordNet and CSO).

## Survey structure

### Question 1

**Title:** HUBBLE: an optical link management system for dense wavelength division multiplexing networks

#### Abstract

Timely detection of Dense Wavelength Division Multiplexing (DWDM) link quality and service performance problems of fiber deployment are important and critical for telecommunication operators. In this paper, we propose a new methodology for network fault detection inside optical transmission systems deployed in a real-operator environment and present the working principles of the system. Our new calculation methodology is used for joint fiber and DWDM link quality evaluation inside the proposed High-level Unified BackBone Link Examiner (HUBBLE) platform. At the end of the paper, we also detail some of the benefits, challenges, and opportunities of automation in DWDM networks using the proposed HUBBLE platform.

| Initial set                            | Refined set      |
|----------------------------------------|------------------|
| Dense wavelength division multiplexing | D.W.D.M          |
| service provider                       | service provider |
| fault management                       | network services |
| link quality                           | link quality     |

### Question 2

**Title:** Feature Completion for Occluded Person Re-Identification

## Abstract

Occluded person re-identification (Re-ID) is a challenging problem due to the destruction of occluders. Most existing methods focus on visible human body parts through some prior information. However, when complementary occlusions occur, features in occluded regions can interfere with matching, which affects performance severely. In this paper, different from most previous works that discard the occluded region, we propose a Feature Completion Transformer (FCFormer) to implicitly complement the semantic information of occluded parts in the feature space. Specifically, Occlusion Instance Augmentation (OIA) is proposed to simulate real and diverse occlusion situations on the holistic image. These augmented images not only enrich the amount of occlusion samples in the training set, but also form pairs with the holistic images. Subsequently, a dual-stream architecture with a shared encoder is proposed to learn paired discriminative features from pairs of inputs. Without additional semantic information, an occluded-holistic feature sample-label pair can be automatically created. Then, Feature Completion Decoder (FCD) is designed to complement the features of occluded regions by using learnable tokens to aggregate possible information from self-generated occluded features. Finally, we propose the Cross Hard Triplet (CHT) loss to further bridge the gap between complementing features and extracting features under the same ID. In addition, Feature Completion Consistency (FC2) loss is introduced to help the generated completion feature distribution to be closer to the real holistic feature distribution. Extensive experiments over five challenging datasets demonstrate that the proposed FCFormer achieves superior performance and outperforms the state-of-the-art methods by significant margins on occluded datasets.

| Initial set              | Refined set              |
|--------------------------|--------------------------|
| Training                 | Training                 |
| Task analysis            | Task analysis            |
| Feature extraction       | Feature extraction       |
| Image retrieval          | Image retrieval          |
| Optimization             | Local convergence        |
| Semantics                | Linguistics terminology  |
| Person re-identification | Person re-identification |
| Data mining              | virtual_learning         |

### Question 3

**Title:** Robust Adaptive Fault-Tolerant Control of Multiagent Systems With Uncertain Nonidentical Dynamics and Undetectable Actuation Failures

#### Abstract

This paper studies the distributed consensus problem of multiagent systems (MASs) in the presence of nonidentical unknown nonlinear dynamics and undetectable actuation failures. Of particular interest is the development of a robust adaptive fault-tolerant consensus protocol capable of compensating uncertain dynamics/disturbances and time-varying yet unpredictable actuation failures simultaneously. By introducing the virtual parameter estimation error into the artfully chosen Lyapunov function, the consensus problem is solved with a robust adaptive fault-tolerant control scheme based upon local (neighboring) agent state information. It is shown that the proposed method is user friendly in that there is no need for detail dynamic information of the agent or costly detection/diagnosis of the actuation faults in control design and implementation, resulting in a structurally simple and computationally inexpensive solution for the leaderless consensus problem of MAS. Simulation results illustrate and verify the benefits and effectiveness of the proposed scheme.

| Initial set            | Refined set            |
|------------------------|------------------------|
| Fault tolerant control | Fault tolerant control |
| Adaptative control     | Mobile agent           |
| Multiagent systems     | Speed control          |

### Question 4

**Title:** Mobile Robot Obstacle Avoidance Based on Neural Network with a Standardization Technique

#### Abstract

Reactive algorithm in an unknown environment is very useful to deal with dynamic obstacles that may change unexpectantly and quickly because the workspace is dynamic in real-life applications, and this work is focusing on the dynamic and unknown environment by online updating data in each step toward a specific goal; sensing and avoiding the obstacles coming across its way toward the target by training to take the corrective action for every possible offset is one of the most challenging problems in the field of robotics. This problem is solved by proposing an Artificial Intelligence System (AIS), which works on the behaviour of Intelligent Autonomous Vehicles (IAVs) like humans in recognition, learning, decision making, and action. First, the use of the AIS and some navigation methods based on Artificial Neural Networks

(ANNs) to training datasets provided high Mean Square Error (MSE) from training on MATLAB Simulink tool. Standardization techniques were used to improve the performance of results from the training network on MATLAB Simulink. When it comes to knowledge-based systems, ANNs can be well adapted in an appropriate form. The adaption is related to the learning capacity since the network can consider and respond to new constraints and data related to the external environment.

| Initial set               | Refined set               |
|---------------------------|---------------------------|
| Obstacle avoidance        | Autonomous vehicles       |
| Simulation-based learning | Simulation-based learning |
| Neural networks           | Radial basis function     |
| Autonomous mobile robots  | Autonomous robots         |

## Question 5

**Title:** Deep temporal motion descriptor (DTMD) for human action recognition

### Abstract

Spatiotemporal features have significant importance in human action recognition, as they provide the actor's shape and motion characteristics specific to each action class. This paper presents a new deep spatiotemporal human action representation, the deep temporal motion descriptor (DTMD), which shares the attributes of holistic and deep learned features. To generate the DTMD descriptor, the actor's silhouettes are gathered into single motion templates by applying motion history images. These motion templates capture the spatiotemporal movements of the actor and compactly represent the human actions using a single 2D template. Then deep convolutional neural networks are used to compute discriminative deep features from motion history templates to produce the DTMD. Later, DTMD is used for learning a model to recognize human actions using a softmax classifier. The advantage of DTMD are that DTMD is automatically learned from videos and contains higher-dimensional discriminative spatiotemporal representations as compared to handcrafted features; DTMD reduces the computational complexity of human activity recognition as all the video frames are compactly represented as a single motion template; and DTMD works effectively for single and multiview action recognition. We conducted experiments on three challenging datasets: MuHAVI-Uncut, iXMAS, and IAVID-1. The experimental findings reveal that DTMD outperforms previous methods and achieves the highest action prediction rate on the MuHAVI-Uncut dataset.

| Initial set                       | Refined set                       |
|-----------------------------------|-----------------------------------|
| Human activity recognition        | Human activity recognition        |
| Deep convolutional neural network | Deep convolutional neural network |

|                                 |                                 |
|---------------------------------|---------------------------------|
| Motion history images           | Motion history images           |
| Deep temporal motion descriptor | Deep temporal motion descriptor |
| Computer vision                 | Linear motor                    |

## Question 6

**Title:** Well placement optimization using metaheuristic bat algorithm

### Abstract

The design of an optimal field development and production management is a complicating task because of influencing various factors on decision-making process. Typical factors include number and type of wells, well locations, production constraints, economic factors like capital expenditure, operating costs, and oil sale price. The situation is further complicated due to the uncertainty associated with various effective engineering and geological parameters.

In this study, three meta-heuristics algorithms of genetic algorithm (GA), particle swarm optimization (PSO) and bat inspired algorithm (BA) are used for optimal determination of six production well locations. Net present value (NPV) is used as an objective function in optimization process. PUNQ-S3 benchmark model is simulated in MATLAB environment in order to search the entire complex reservoir during optimization. Next, the effectiveness of algorithms will be compared in terms of convergence rate and NPV improvement over iterations.

The simulation results show that the BA is superior since it reduces the number of functional evaluations and thus improving the computational efficiency. In addition, the BA provides better NPV improvement over PSO and GA. The results indicate that the BA increases NPV by 7.5% and 21.7% over PSO and GA respectively.

| Initial set                      | Refined set                      |
|----------------------------------|----------------------------------|
| Fractional calculus              | Fractals                         |
| Bat algorithm                    | Bat algorithm                    |
| Levy flight                      | Nonlinear equations              |
| Non-parametric statistical tests | Non-parametric statistical tests |

## Question 7

**Title:** An Iterated Multi-stage Selection Hyper-heuristic**Abstract**

There is a growing interest towards the design of reusable general purpose search methods that are applicable to different problems instead of tailored solutions to a single particular problem. Hyper-heuristics have emerged as such high level methods that explore the space formed by a set of heuristics (move operators) or heuristic components for solving computationally hard problems. A selection hyper-heuristic mixes and controls a predefined set of low level heuristics with the goal of improving an initially generated solution by choosing and applying an appropriate heuristic to a solution in hand and deciding whether to accept or reject the new solution at each step under an iterative framework. Designing an adaptive control mechanism for the heuristic selection and combining it with a suitable acceptance method is a major challenge, because both components can influence the overall performance of a selection hyper-heuristic. In this study, we describe a novel iterated multi-stage hyper-heuristic approach which cycles through two interacting hyper-heuristics and operates based on the principle that not all low level heuristics for a problem domain would be useful at any point of the search process. The empirical results on a hyper-heuristic benchmark indicate the success of the proposed selection hyper-heuristic across six problem domains beating the state-of-the-art approach.

| Initial set                  | Refined set                  |
|------------------------------|------------------------------|
| Hyperheuristics              | Cognitive systems            |
| Simultaneous multithreadings | Simultaneous multi-threading |
| Resource partitioning        | Resource partitioning        |
| Fuzzy partition              | Optimization techniques      |

**Question 8**

**Title:** An alternative method of biomedical signal transmission through the GSM voice channel

**Abstract**

In this work, a new solution for online and accurate biomedical data transmission is presented. For this purpose, a global system for mobile (GSM) communication voice channel is, for the first time, used as a communication link between the patient and healthcare provider. Biomedical signals are converted into speech-like signals before being transferred over a GSM



voice channel. On the receiver side, speech-like symbols are stored in a symbols bank, and constructed using random stochastic signals. On the receiver end, the index of the symbol with the most similarity to the received signal is selected as the identified sample. This method enables us to communicate with an accuracy of 99.8% at a transfer rate of 110 samples per second and signal-to-noise ratio (SNR) of 10. By utilizing a GSM voice channel, any voice channel, such as a cell phone, can be used for data transmission. The transmitted signal is encoded; therefore, the connection is secured. GSM technology has benefits such as availability, reliability, and robustness. Additionally, GSM can be used as a backup or service for transmitting vital physiological signals in emergency situations (e.g. in an ambulance). This technology can also be used to transmit other physiological signals as well as nonphysiological generic data.

| Initial set         | Refined set             |
|---------------------|-------------------------|
| Electrocardiography | Mathematics in medicine |
| GSM                 | GSM                     |
| Telemedicine        | Telemedicine            |
| Voice               | Voice                   |
| Speech codecs       | Speech codecs           |

## Question 9

**Title:** Characterizing Generalized Rate-Distortion Performance of Video Coding : An Eigen Analysis Approach

### Abstract

Rate-distortion (RD) theory is at the heart of lossy data compression. Here we aim to model the generalized RD (GRD) trade-off between the visual quality of a compressed video and its encoding profiles (e.g., bitrate and spatial resolution). We first define the theoretical functional space  $W$  of the GRD function by analyzing its mathematical properties. We show that  $W$  is a convex set in a Hilbert space, inspiring a computational model of the GRD function, and a method of estimating model parameters from sparse measurements. To demonstrate the feasibility of our idea, we collect a large-scale database of real-world GRD functions, which turn out to live in a low-dimensional subspace of  $W$ . Combining the GRD reconstruction framework and the learned low-dimensional space, we create a low-parameter eigen GRD method to accurately estimate the GRD function of a source video content from only a few queries. Experimental results on the database show that the learned GRD method significantly outperforms state-of-the-art empirical RD estimation methods both in accuracy and efficiency. Last, we demonstrate the promise of the proposed model in video codec comparison.

| Initial set              | Refined set              |
|--------------------------|--------------------------|
| Rate-distortion function | Rate-distortion function |
| Video quality assessment | Video quality            |
| Quadratic programming    | Quadratic programming    |

## Question 10

**Title:** WONDER: Weighted One-shot Distributed Ridge Regression in High Dimensions

### Abstract

In many areas, practitioners need to analyze large datasets that challenge conventional single-machine computing. To scale up data analysis, distributed and parallel computing approaches are increasingly needed.

Here we study a fundamental and highly important problem in this area: How to do ridge regression in a distributed computing environment? Ridge regression is an extremely popular method for supervised learning, and has several optimality properties, thus it is important to study. We study one-shot methods that construct weighted combinations of ridge regression estimators computed on each machine. By analyzing the mean squared error in a high dimensional random-effects model where each predictor has a small effect, we discover several new phenomena.

1. Infinite-worker limit: The distributed estimator works well for very large numbers of machines, a phenomenon we call "infinite-worker limit".
2. Optimal weights: The optimal weights for combining local estimators sum to more than unity, due to the downward bias of ridge. Thus, all averaging methods are suboptimal.

We also propose a new Weighted ONE-shot DistributEd Ridge regression (WONDER) algorithm. We test WONDER in simulation studies and using the Million Song Dataset as an example. There it can save at least 100x in computation time, while nearly preserving test accuracy.

| Initial set                 | Refined set                 |
|-----------------------------|-----------------------------|
| Distributed learning        | Learning methods            |
| High-dimensional statistics | High-dimensional statistics |
| Ridge regression            | Optimization techniques     |
| Random matrix theory        | Random variable             |
